# Supplementary material
Source: PubMed Central journal article supplement (PMC8174188)
Supplement: NIHMS1703619-supplement-1.pdf [file NIHMS1703619-supplement-1.pdf]

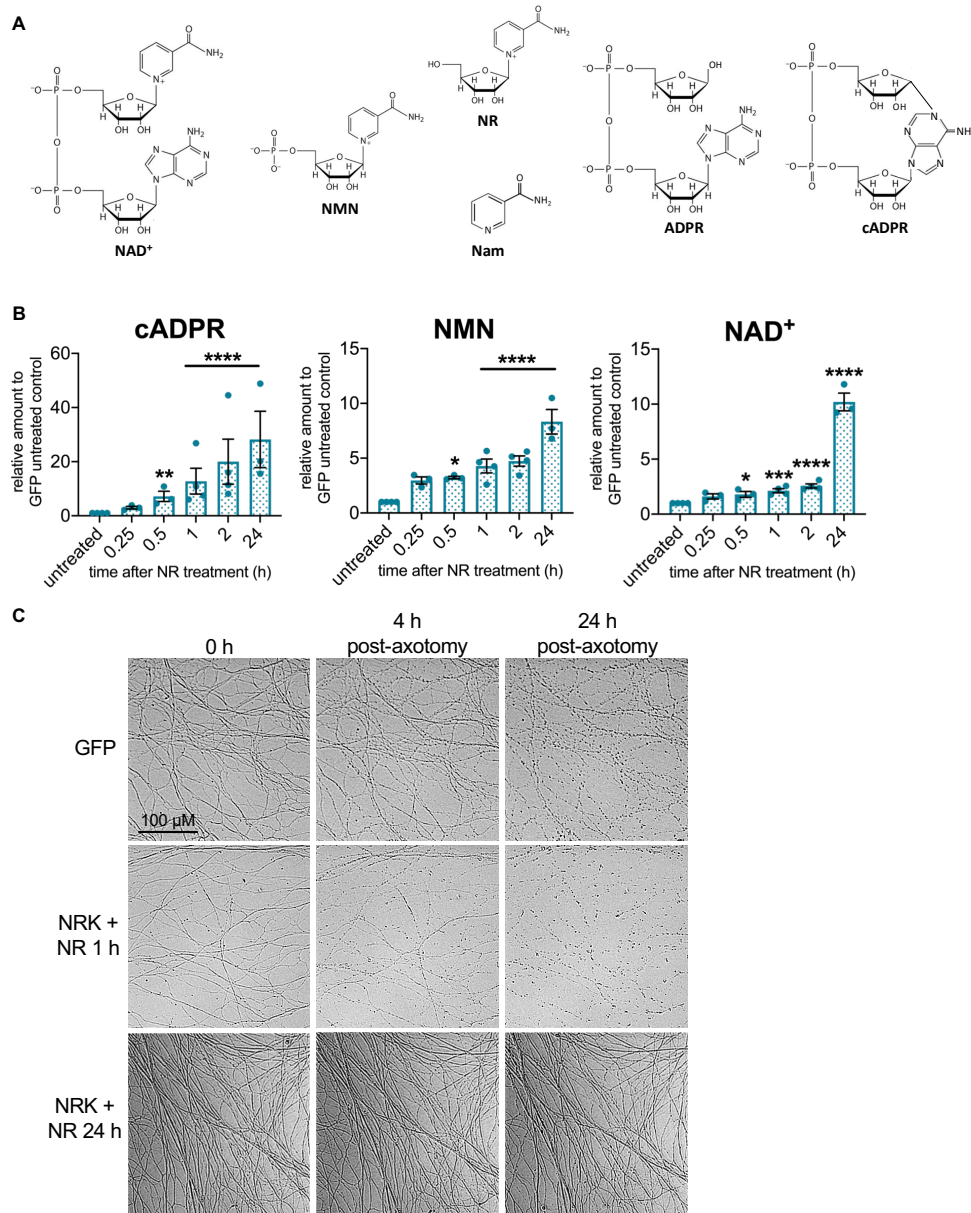

**Figure S1: LC-MS-MS measurements from primary neurons treated with NR (Related to Figure 1).**

**A)** 2D structures of  $\text{NAD}^+$  and  $\text{NAD}^+$ -related molecules. **B)** NMN, cADPR and  $\text{NAD}^+$  levels in primary eDRG neurons with lentiviral expression of GFP control and treated with NR, as measured by LC-MS-MS. Data correspond to means from replicate experiments and error bars denote  $\pm$ SEM. Statistical significance was determined by nonparametric Kruskal-Wallis test with Dunn's test for multiple comparisons, comparing each time-point to untreated control. \* denotes  $P$  value  $\leq 0.05$ ; \*\*  $\leq 0.01$ ; \*\*\*  $\leq 0.001$ ; \*\*\*\*  $\leq 0.0001$ . **C)** Representative images of embryonic DRG axons that are quantified in Figure 1D.

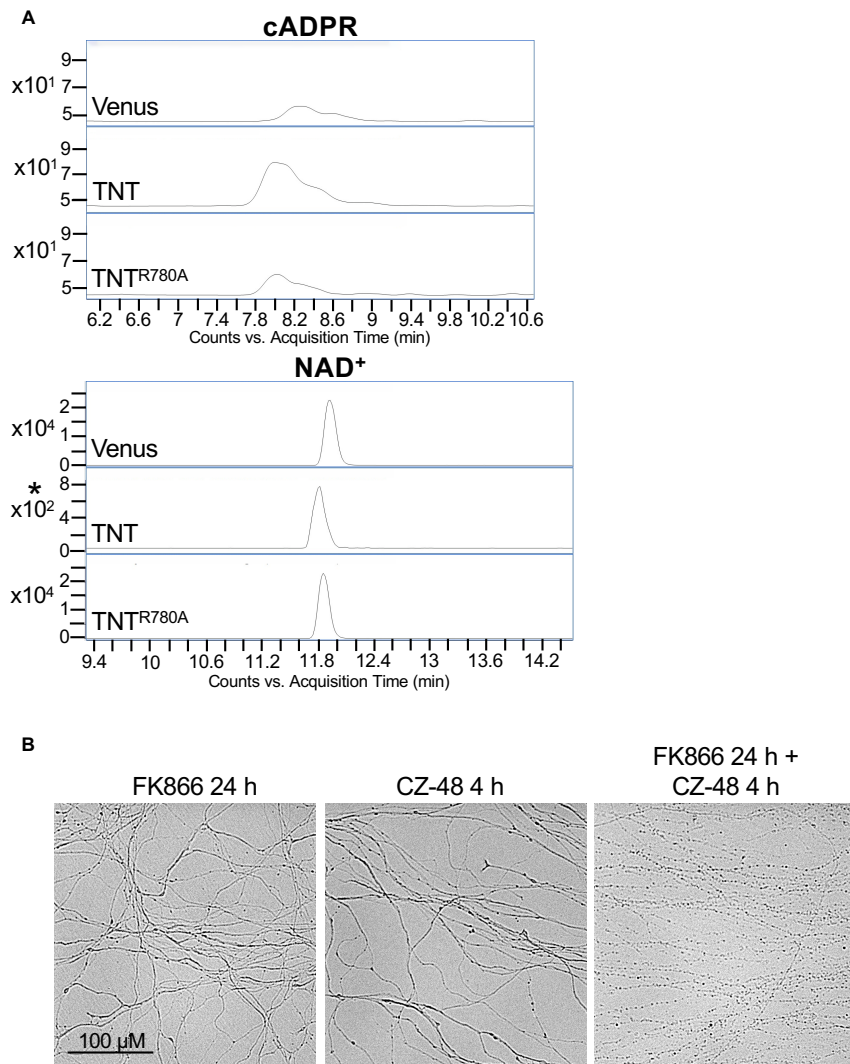

**Figure S2: LCMS data and axon images (Related to Figure 2).**

**A)** Representative LCMS peaks for cADPR and NAD<sup>+</sup> collected from primary neurons expressing Venus, TNT, or TNT<sup>R780A</sup>. For NAD<sup>+</sup>, \* denotes different Y axis scale ( $10^2$ ) to show low NAD<sup>+</sup> levels in the TNT condition, compared to  $10^4$  in Venus and TNT<sup>R780A</sup> conditions. **B)** Representative images of axons quantified in Figure 2C.

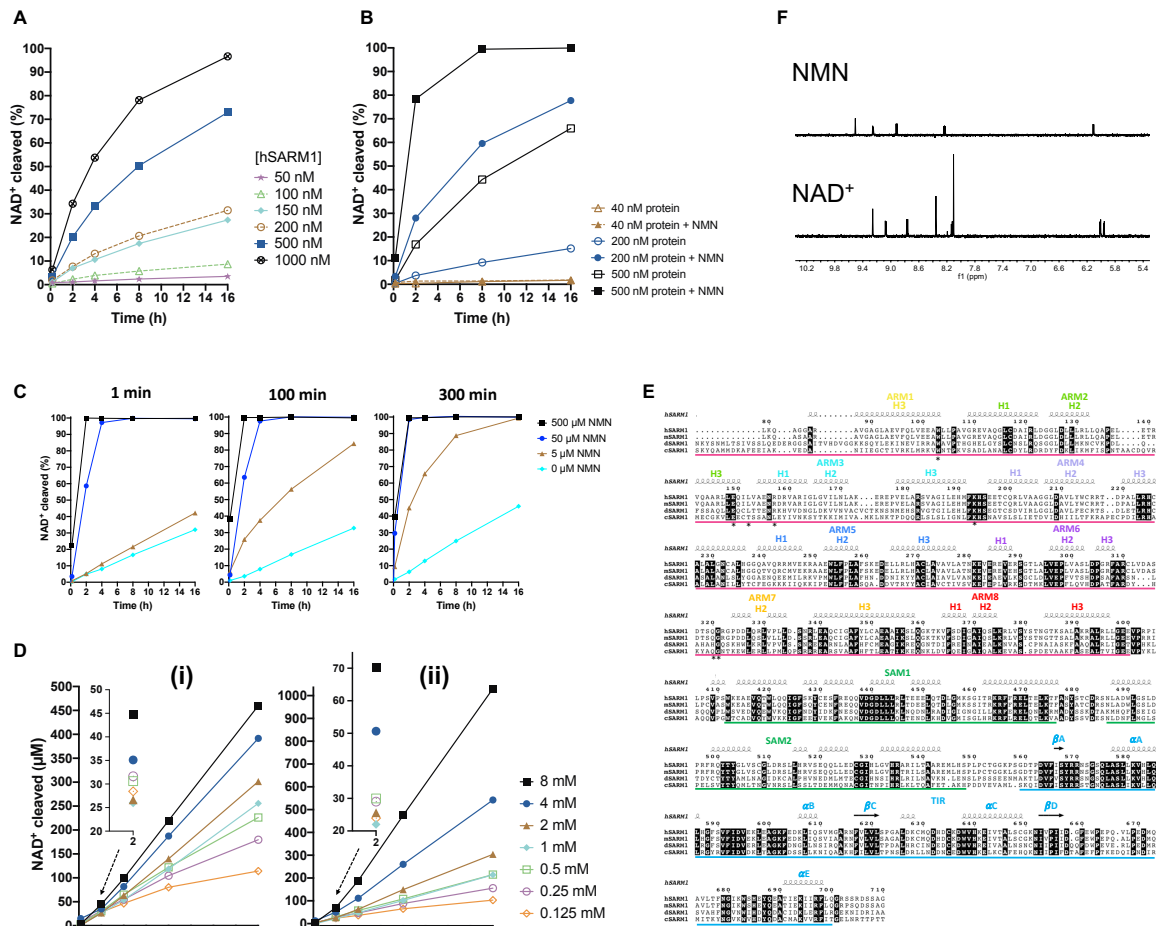

**Figure S3: NMR and sequence analyses of SARM1 (Related to Figure 3).**

**A)** NADase activity increases as hSARM1 concentration increases. The initial concentration of  $\text{NAD}^+$  was  $500 \mu\text{M}$  for all six samples. **B)** NMN activation of hSARM1 NADase activities at different hSARM1 concentrations. The initial concentration of  $\text{NAD}^+$  was  $500 \mu\text{M}$  for all six samples, while an NMN concentration of  $500 \mu\text{M}$  was used for activation. **C)** Different NMN concentrations with 1 min (left panel), 100 min (middle panel) and 300 min (right panel) pre-incubation result in different degrees of activation. The protein concentration was  $0.5 \mu\text{M}$ , while the initial concentration of  $\text{NAD}^+$  was  $500 \mu\text{M}$  for all four samples. **D)** NADase activity of hSARM1 with different initial concentrations of  $\text{NAD}^+$ . Protein concentration was  $0.5 \mu\text{M}$  for all 7 samples. The inset highlights data at the reaction time of 2 h. Two experiments are shown (i and ii). Both experiments show that increased  $\text{NAD}^+$  concentration primarily leads to increased  $\text{NAD}^+$  cleavage activity. **E)** Sequence alignment of human, mouse, *C. elegans* and *Drosophila* SARM1. The alignment was generated using T-coffee Multiple Sequence Alignment Server (Expresso) (Notredame et al., 2000) and analyzed using ESPript. The ARM, SAM and TIR domains are underlined in magenta, lime and light blue, respectively. Conserved residues are highlighted with black boxes. Residues involved in NMN interaction are indicated by stars. Elements of secondary structure are indicated above the sequence, corresponding to the cryo-EM structure of hSARM1. **F)** STD NMR spectra showing NMN and  $\text{NAD}^+$  binding to hSARM1, respectively. The protein concentration was  $5.25 \mu\text{M}$  for both samples, while the initial concentrations of NMN and  $\text{NAD}^+$  were both  $500 \mu\text{M}$ . The  $\text{NAD}^+$  signals appear to be stronger, a possible result of its weaker binding to the ARM domain.

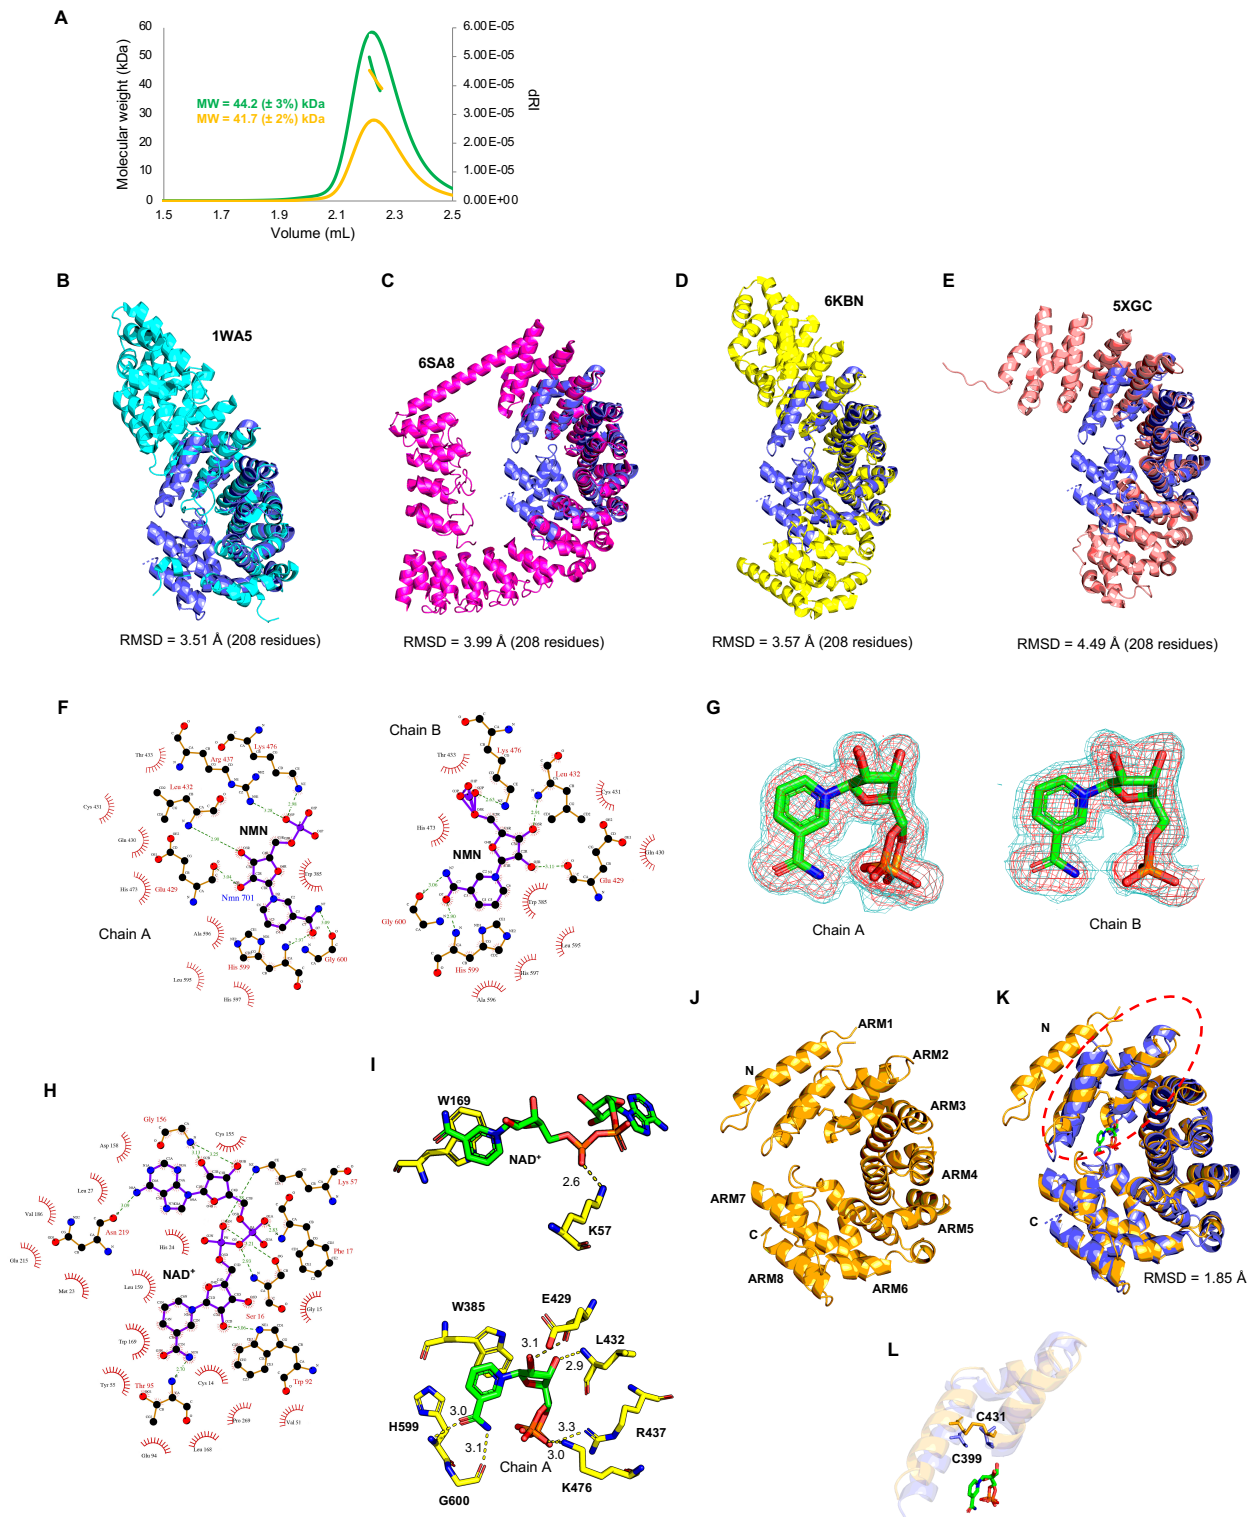

**Figure S4: SEC-MALS and structural analyses of dSARM1<sup>ARM</sup> (Related to Figure 4).**

**A)** SEC-MALS profile of dSARM1<sup>ARM</sup> in the absence (green) and presence (orange) of NMN. The lines denote the average molecular mass distributions across the peak. The theoretical molecular weight of monomeric dSARM1<sup>ARM</sup> is 41.2 kDa. **B-E)** The dSARM1<sup>ARM</sup> protein displays a more compact conformation than previously reported ARM-domain structures. Superpositions (using cealign in PyMOL) of NMN-bound dSARM1<sup>ARM</sup> (slate) with several ARM domain-containing proteins in ribbon representation: (B) ARM domain from Kap60p (importin- $\alpha$ ; cyan; PDB: 1WA5; (Matsuura et al., 2004)); (C) ring-like fusion protein with designed armadillo and ankyrin



repeats (magenta; PDB: 6SA8; (Ernst et al., 2019)); (D) vacuolar protein 8 (yellow; PDB: 6KBN; (Park et al., 2020)); (E) small GTPase-GDP dissociation stimulator-558 (pink; PDB: 5XGC; (Shimizu et al., 2017)). **F)** Ligplot diagram of dSARM1<sup>ARM</sup> interacting with NMN. **G)** Standard omit (red mesh) and Polder (teal mesh) mFo-DFc maps for the NMN molecule in dSARM1<sup>ARM</sup>. **H)** Ligplot diagram of human NMNAT interacting with NAD<sup>+</sup> (PDB: 1KQN; (Zhou et al., 2002b)). **I)** Stick representation of the interaction between NMNAT and NAD<sup>+</sup> (PDB: 1KQN; (Zhou et al., 2002b)) (top), and between dSARM1<sup>ARM</sup> (chain A) and NMN (bottom, for comparison). **J)** Cartoon representation of the ligand-free dSARM1<sup>ARM</sup> crystal structure. **K)** Superposition of the ligand-free (orange) and NMN-bound dSARM1<sup>ARM</sup> (chain A, slate). **L)** Zoom-in cartoon representation of ARM2 marked with the red dashed circle in panel K, highlighting the cysteines C399 and C431, and NMN in stick representation.

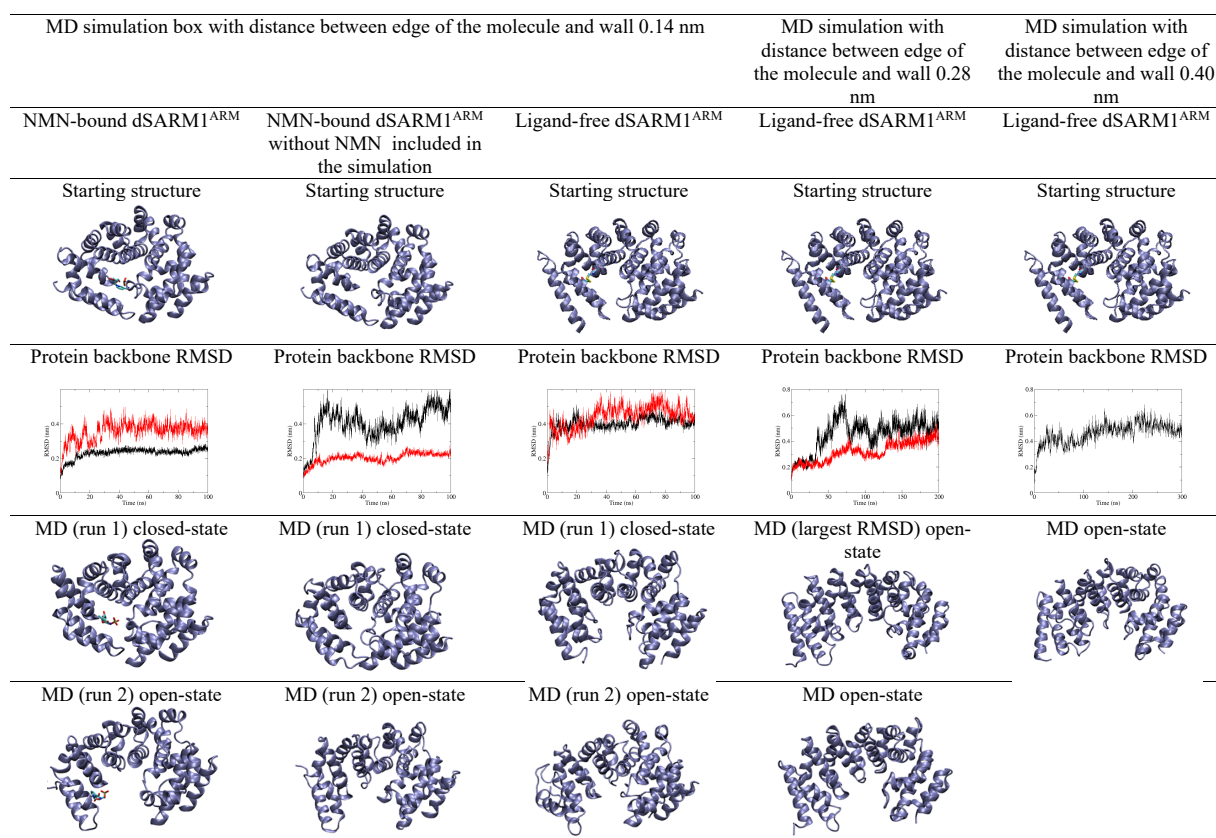

**Figure S5: Molecular dynamics simulations of dSARM1<sup>ARM</sup> (Related to Figure 4).**

Starting structures, atom-positional RMSDs of the backbone atoms ( $C_{\alpha}$ , N, C) and final or representative structures of NMN-bound dSARM1<sup>ARM</sup> (column 1); NMN-bound dSARM1<sup>ARM</sup> without NMN included in the simulation (column 2); ligand-free dSARM1<sup>ARM</sup> (column 3) from duplicate 100 ns MD simulations (black and red); ligand-free dSARM1<sup>ARM</sup> (column 4) from duplicate 200 ns MD simulations (black and red), using a larger MD simulation box; and ligand-free dSARM1<sup>ARM</sup> (column 5) from 200 ns MD simulations, using the largest MD simulation box. The ligand NMN is shown in stick representation. The disulfide between C399-C431 in the ligand-free crystal (starting) structure is shown in stick representation. No disulfides were included in MD simulations. The MD simulations revealed that both open- and closed-conformations (crystallized state) can be observed for all three systems (column 1-3). In MD simulations performed with ligand-free dSARM1<sup>ARM</sup> using larger box sizes and longer simulation times (column 4 and 5), the structure opened up within 100 ps and remained in the open-state throughout the simulations.

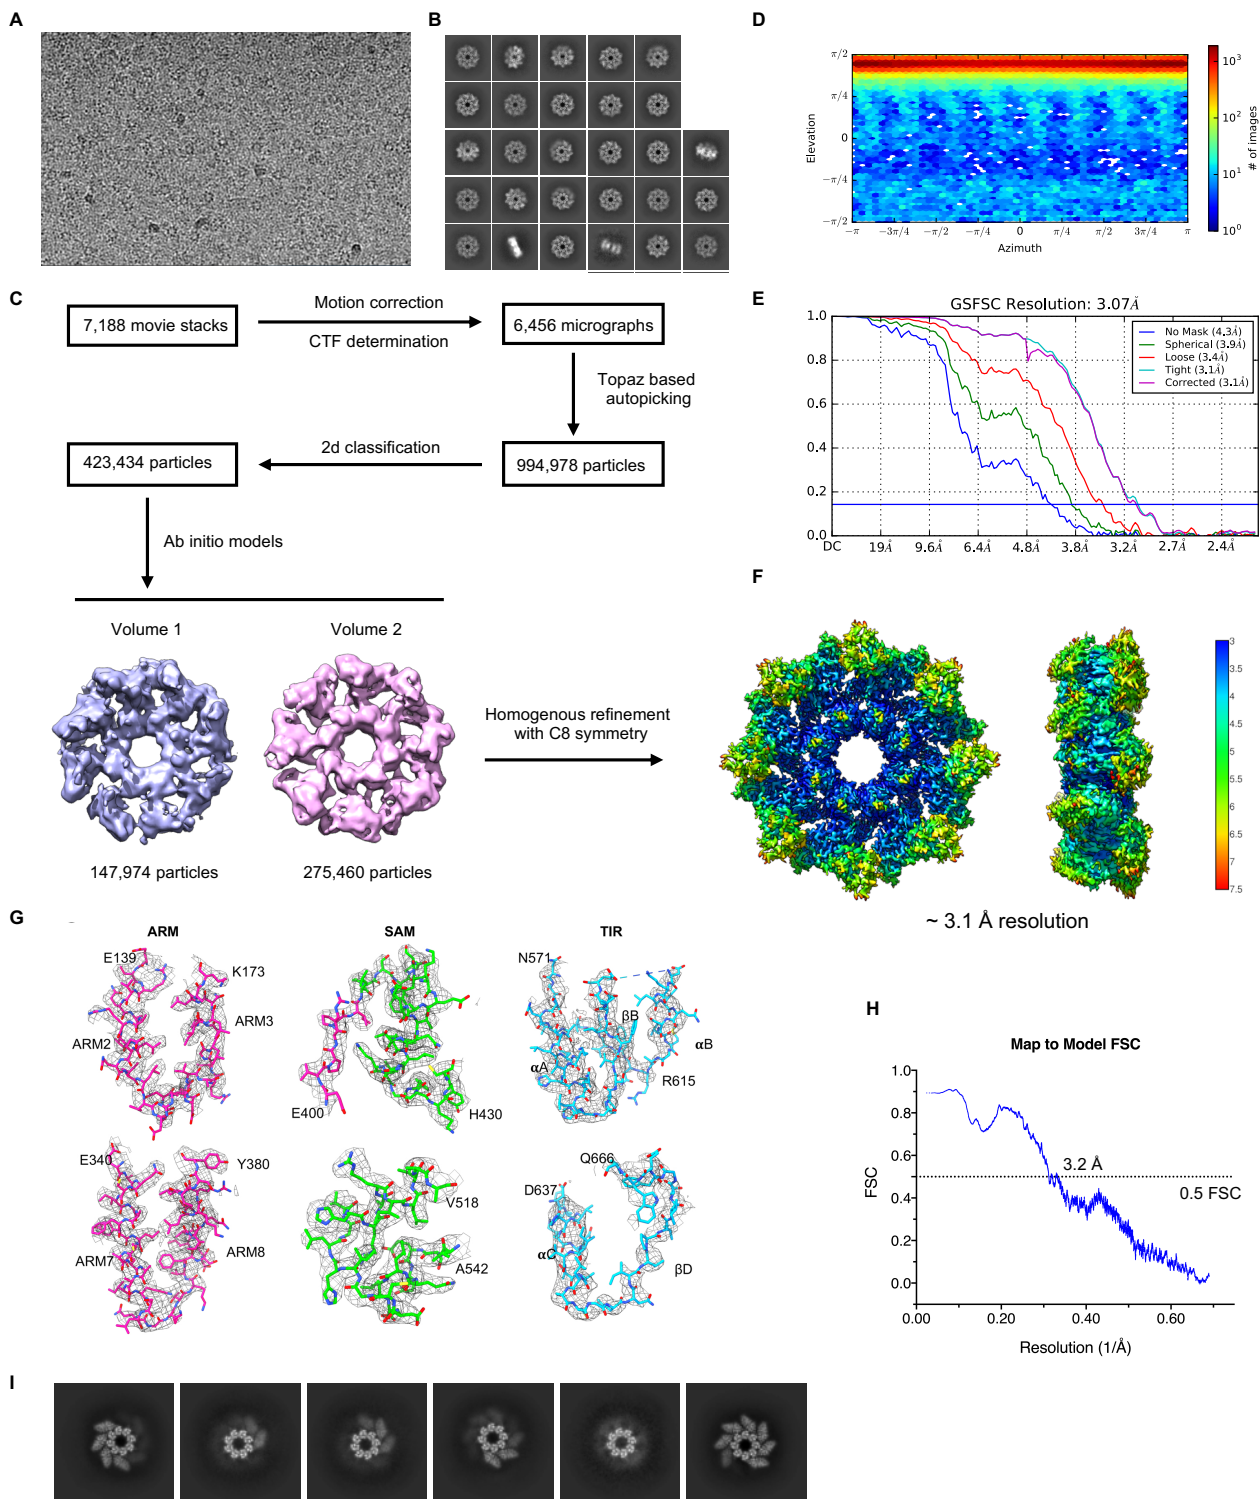

**Figure S6: Cryo-EM structure of ligand-free hSARM1 (Related to Figure 5).**

**A)** Representative cryo-EM micrograph of hSARM1. **B)** Representative 2D class averages. **C)** Flow-chart of the cryo-EM processing steps. **D)** Angular distribution plots of the final 3D reconstruction. **E)** Gold-standard FSC curves of the final 3D reconstruction. **F)** Local resolution map. **G)** Representative electrostatic potential density maps for the hSARM1 ARM, SAM and TIR domains. Labelled residues indicate the start and end of the displayed amino acid chain. **H)** Map-to-model FSC curve of the final model and DeepEMhancer post-processed map. **I)** Representative 2D class averages of hSARM1 particles with an incomplete peripheral ARM domain ring.

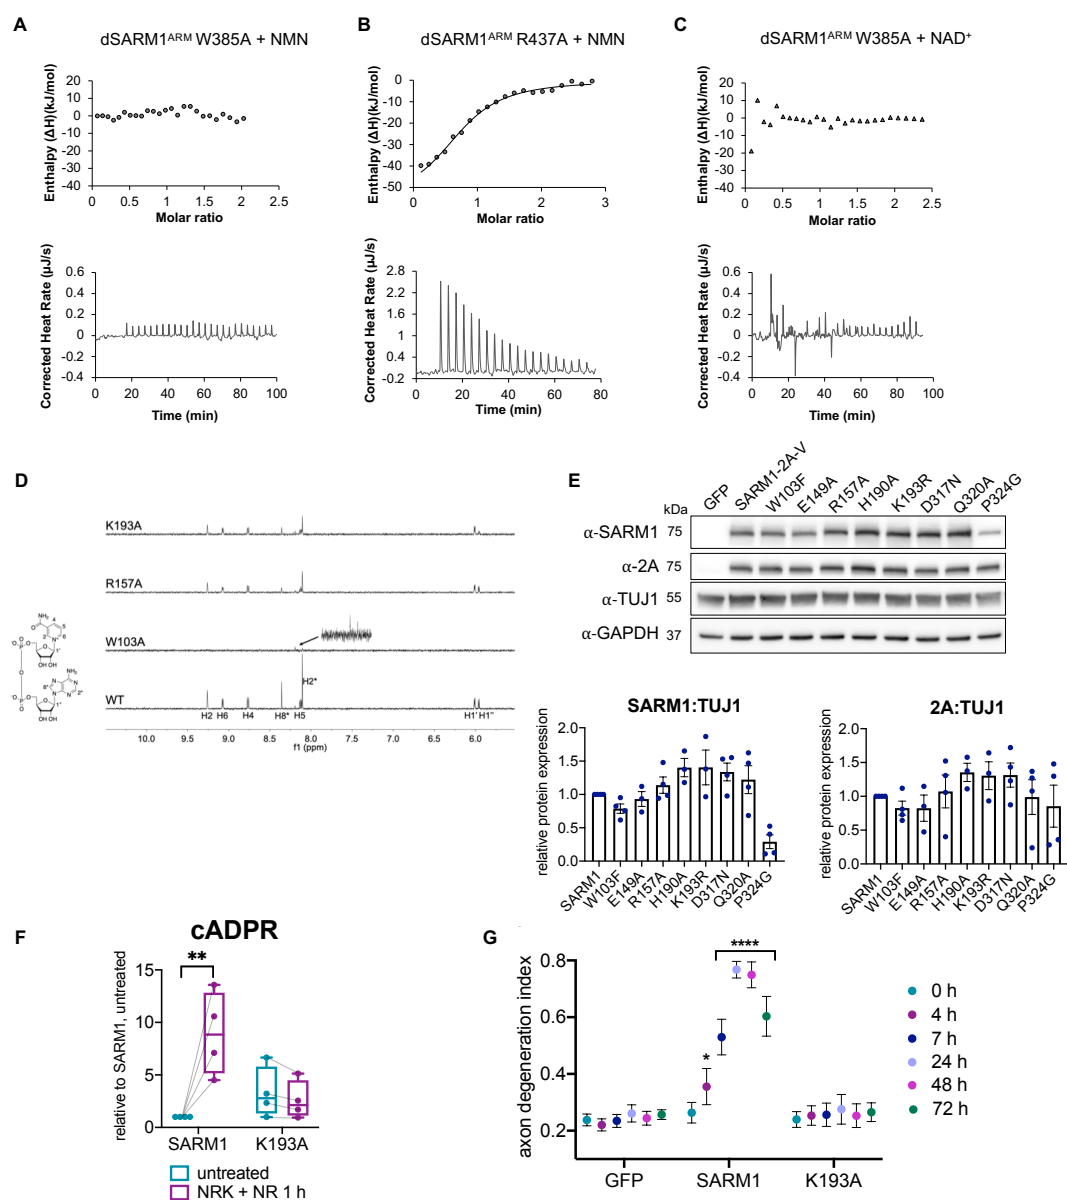

**Figure S7: Characterization of hSARM1 NMN-binding pocket mutants (Related to Figure 6).**

**A)** Raw (bottom) and integrated ITC data (top) for the titration of 1 mM NMN with 100 μM dSARM1<sup>ARM</sup> W385A. **B)** Raw (bottom) and integrated ITC data (top) for the titration of 0.6 mM NMN with 85 μM dSARM1<sup>ARM</sup> R437A. **C)** Raw (bottom) and integrated ITC data (top) for the titration of 0.7 mM NAD<sup>+</sup> with 100 μM dSARM1<sup>ARM</sup> W385A. **D)** STD NMR spectra showing NAD<sup>+</sup> binding to WT and mutant hSARM1 proteins. The protein concentration was 5.25 μM, while the initial NAD<sup>+</sup> concentration was 500 μM for all samples. **E)** Representative western blot to detect protein expression of SARM1 after lentiviral expression in primary eDRG neurons from *Sarm1*<sup>-/-</sup> mice. Quantification of relative protein expression comparing SARM1 to tubulin loading control (TUJ1) and 2A to TUJ1. The SARM1 antibody was generated using a peptide containing P324 and the P324G mutant is poorly detected by this antibody. **F)** cADPR levels from primary eDRG neurons from *Sarm1*<sup>-/-</sup> mice expressing wild-type or mutant SARM1 and NRK1 from lentivirus, untreated or after 1 h NR [100 μM] treatment, relative to levels from untreated wild-type SARM1 expressing neurons, measured by LC-MS-MS. **G)** Axon degeneration time course after axotomy in primary eDRG neurons from *Sarm1*<sup>-/-</sup> mice expressing wild-type or mutant SARM1 from lentivirus, quantified as degeneration index (DI), where a DI of 0.35 or above represents degenerated axons. Data correspond to means from replicate experiments and error bars denote ±SEM. Statistical significance was determined by two-way ANOVA with Dunnett's multiple



comparison test, comparing each time-point to time 0 h within each condition. \* denotes P value  $\leq 0.05$ ; \*\*  $\leq 0.01$ ; \*\*\*  $\leq 0.001$ ; \*\*\*\*  $\leq 0.0001$ .

**Table S1: Crystallographic analysis (Related to Figure 4).**

| <b>Data collection</b>               |                                   |                                 |                                           |                                         |
|--------------------------------------|-----------------------------------|---------------------------------|-------------------------------------------|-----------------------------------------|
|                                      | Ligand-free dSARM1 <sup>ARM</sup> | NMN-bound dSARM1 <sup>ARM</sup> | NMN-bound dSARM1 <sup>ARM</sup> (Br soak) | NMN-bound dSARM1 <sup>ARM</sup> (SeMet) |
| Space group                          | P1 2 <sub>1</sub> 1               | P1                              | P1                                        | P1                                      |
| a, b, c (Å)                          | 63.30, 101.36, 98.57              | 38.92, 50.79, 76.05             | 39.07, 51.08, 75.73                       | 38.89, 50.31, 75.22                     |
| α, β, γ (°)                          | 90, 103.77, 90                    | 103.52, 101.90, 95.26           | 103.38, 101.52, 96.66                     | 104.86, 101.36, 94.91                   |
| Resolution (Å)                       | 47.87-3.35 (3.61-3.35)            | 71.88-1.46 (1.60-1.46)          | 48.97-1.68 (1.82-1.68)                    | 48.12-1.89 (2.11-1.89)                  |
| R <sub>merge</sub>                   | 0.23 (1.36)                       | 0.05 (0.95)                     | 0.08 (1.77)                               | 0.07 (0.76)                             |
| R <sub>meas</sub>                    | 0.32 (1.88)                       | 0.06 (1.15)                     | 0.09 (2.05)                               | 0.09 (1.08)                             |
| R <sub>pim</sub>                     | 0.22 (1.30)                       | 0.03 (0.63)                     | 0.04 (1.01)                               | 0.07 (0.76)                             |
| Mean I/σ (I)                         | 4.7 (1.1)                         | 15.9 (1.6)                      | 13.9 (1.0)                                | 9.2 (1.2)                               |
| CC <sub>1/2</sub>                    | 1.00 (0.37)                       | 1.00 (0.63)                     | 1.00 (0.40)                               | 1.00 (0.47)                             |
| Total reflections                    | 58,693 (11,162)                   | 456,719 (20,265)                | 393,818 (19,421)                          | 86,502 (4,041)                          |
| Unique reflections                   | 17,198 (3,286)                    | 64,028 (3,201)                  | 48,934 (2,447)                            | 24,291 (1,216)                          |
| Completeness (spherical)             | 97.7 (91.1)                       | 67.2 (14.2)                     | 78.2 (19.1)                               | 56.6 (10.0)                             |
| Completeness (ellipsoidal)           |                                   | 83.5 (40.3)                     | 90.0 (44.7)                               | 85.3 (38.8)                             |
| Multiplicity                         | 3.4 (3.4)                         | 7.1 (6.3)                       | 8.0 (7.9)                                 | 3.6 (3.3)                               |
| Anomalous completeness (spherical)   | 91.1 (84.0)                       | 66.5 (14.0)                     | 76.4 (18.5)                               | 55.8 (9.7)                              |
| Anomalous completeness (ellipsoidal) |                                   | 82.7 (39.8)                     | 87.9 (43.4)                               | 84.1 (38.0)                             |
| Anomalous multiplicity               | 1.6 (1.7)                         | 3.6 (3.2)                       | 4.1 (4.1)                                 | 1.8 (1.7)                               |
| <b>Refinement</b>                    |                                   |                                 |                                           |                                         |
|                                      | Ligand-free dSARM1 <sup>ARM</sup> | NMN-bound dSARM1 <sup>ARM</sup> |                                           |                                         |
| Resolution (Å)                       | 47.87-3.35                        | 37.67-1.65                      |                                           |                                         |
| R <sub>work</sub>                    | 0.2445                            | 0.2120                          |                                           |                                         |
| R <sub>free</sub>                    | 0.2716                            | 0.2295                          |                                           |                                         |
| RMS bonds (Å)                        | 0.002                             | 0.002                           |                                           |                                         |
| RMS angles (°)                       | 0.890                             | 0.473                           |                                           |                                         |
| Ramachandran favored (%)             | 95.32                             | 98.51                           |                                           |                                         |
| Ramachandran outliers (%)            | 0                                 | 0.33                            |                                           |                                         |
| Rotamer outliers (%)                 | 0                                 | 0.19                            |                                           |                                         |
| Clashscore                           | 4.72                              | 1.64                            |                                           |                                         |
| Average B-factor (Å <sup>2</sup> )   | 90.85                             | 27.77                           |                                           |                                         |
| C-beta outliers                      | 0                                 | 0                               |                                           |                                         |

1. The statistics were calculated using AIMLESS (ligand-free) (Evans and Murshudov, 2013), autoPROC (NMN-bound) (Vonrhein et al., 2011) and MolProbity (Williams et al., 2018).
2. The numbers in parentheses represent the highest resolution shell.
3.  $R_{\text{merge}} = \frac{\sum_{hkl} \sum_j |I_{hkl,j} - \langle I_{hkl} \rangle|}{\sum_{hkl} \sum_j I_{hkl,j}}$ ;  $R_{\text{meas}} = \frac{\sum_{hkl} [N/(N-1)]^{1/2} \sum_j |I_{hkl,j} - \langle I_{hkl} \rangle|}{\sum_{hkl} \sum_j I_{hkl,j}}$ ;  $R_{\text{pim}} = \frac{\sum_{hkl} [1/(N-1)]^{1/2} \sum_j |I_{hkl,j} - \langle I_{hkl} \rangle|}{\sum_{hkl} \sum_j I_{hkl,j}}$ .
4.  $R_{\text{work}} = \frac{\sum_{hkl} |F_{\text{obs}hkl} - F_{\text{calc}hkl}|}{\sum_{hkl} |F_{\text{obs}hkl}|}$ ;  $R_{\text{free}}$  is equivalent to  $R_{\text{work}}$ , with 5% of data excluded from refinement process.  $|F_{\text{obs}hkl}|$  and  $|F_{\text{calc}hkl}|$  represent the observed and calculated structure factor amplitudes, respectively.

**Table S2: Proteins structurally similar to dSARM1<sup>ARM</sup>, based on Dali analysis (Related to Figure 4 and S4).**

| PDB ID | Z score | RMSD (Å) | Description                                                          |
|--------|---------|----------|----------------------------------------------------------------------|
| 6wpk*  | 29.2    | 2.9      | NAD(+) hydrolase SARM1                                               |
| 1wa5   | 17.1    | 2.7      | Kap60p (importin-alpha)                                              |
| 6sa8   | 15.7    | 3.4      | Ring-like fusion protein with designed armadillo and ankyrin repeats |
| 6kbn   | 15.4    | 5.5      | Vacuolar protein 8                                                   |
| 5xgc   | 15.4    | 3.3      | Small GTPase-GDP dissociation stimulator-558 (SmgGDS-558)            |
| 3nmz   | 15.3    | 2.5      | Adenomatous polyposis coli (APC)                                     |
| 4r0z   | 15.0    | 3.3      | $\beta$ -Catenin homolog HMP-2                                       |
| 1xqr   | 15.0    | 4.2      | Hsp70 binding protein 1 (HspBP1)                                     |
| 3l6x   | 14.8    | 3.2      | p120 isoform 4A                                                      |
| 5ewp   | 14.4    | 2.9      | Armadillo repeats only protein from <i>Plasmodium falciparum</i>     |
| 4k6j   | 13.8    | 3.3      | Wings apart-like protein (Wapl)                                      |
| 5lsw   | 13.7    | 3.8      | Roquin CAF40                                                         |
| 6u62   | 13.6    | 3.0      | Mechanistic target of rapamycin complex 1 (mTORC1)                   |
| 4hm9   | 13.5    | 3.1      | Beta-catenin-like protein 1                                          |
| 3opb   | 13.4    | 3.5      | Swi5-dependent HO expression protein 4 (She4p)                       |
| 3gq2   | 13.2    | 3.8      | p115                                                                 |
| 3ebb   | 13.0    | 4.1      | Phospholipase A2-activating protein (PLAA)                           |
| 3c2g   | 12.7    | 3.7      | Sys-1 protein                                                        |
| 6tc0   | 12.7    | 3.2      | MMS19 nucleotide excision repair protein homolog                     |
| 6hb3   | 12.6    | 3.4      | Hgh1                                                                 |
| 4g3a   | 12.6    | 4.4      | Microtubule-associated protein Mast/Orbit                            |
| 2xwu   | 12.6    | 4.2      | Importin13                                                           |
| 6lth   | 12.6    | 2.9      | AT-rich interactive domain-containing protein 1A                     |
| 5z58   | 12.5    | 5.8      | Splicing factor 3B subunit 1                                         |
| 4i2w   | 12.2    | 3.4      | UNC-45                                                               |

\*ARM domain from the published cryo-EM structure of SARM1 (Bratkowski et al., 2020).

**Table S3: NMN-interacting residues in *Drosophila* and human SARM1, based on the dSARM1<sup>ARM</sup> crystal structure (Related to Figure 4).**

| <b>hSARM1</b> | <b>dSARM1</b> | <b>Region</b> | <b>Interacting moiety of NMN</b> |
|---------------|---------------|---------------|----------------------------------|
| W103          | W385          | 1             | Nicotinamide                     |
| R110          | H392          | 1             | Nicotinamide                     |
| Q114          | Y396          | 1             | Phosphate                        |
| E149          | E429          | 2             | Ribose                           |
| Q150          | Q430          | 2             | Ribose                           |
| I151          | C431          | 2             | Ribose                           |
| L152          | L432          | 2             | Ribose                           |
| V153          | T433          | 2             | Ribose                           |
| A154          | T434          | 2             | Ribose                           |
| R157          | R437          | 2             | Phosphate                        |
| H190          | H473          | 3             | Phosphate                        |
| K193          | K476          | 3             | Phosphate                        |
| S316          | L595          | 4             | Nicotinamide                     |
| D317          | A596          | 4             | Nicotinamide                     |
| T318          | H597          | 4             | Nicotinamide                     |
| S319          | A598          | 4             | Nicotinamide                     |
| Q320          | H599          | 4             | Nicotinamide                     |
| G321          | G600          | 4             | Nicotinamide                     |
| R322          | Q601          | 4             | Nicotinamide                     |
| G323          | S602          | 4             | Phosphate                        |



**Table S4: Cryo-EM analysis (Related to Figure 5 and S6).**

|                                              | <b>hSARM1<sup>28-724</sup></b>    |
|----------------------------------------------|-----------------------------------|
| <b>Data collection and processing</b>        |                                   |
| Microscope                                   | Titan Krios                       |
| Detector                                     | Gatan K3 direct electron detector |
| Voltage (kV)                                 | 300                               |
| Nominal magnification                        | 81,000                            |
| Super resolution pixel size (Å)              | 0.543                             |
| Binned pixel size (Å)                        | 1.09                              |
| Defocus range (µm)                           | -1.5 to -2.7                      |
| Total exposure (e/Å <sup>2</sup> )           | 54                                |
| Exposure per frame (e/Å <sup>2</sup> )       | 1.2                               |
| Total micrographs (no.)                      | 7188                              |
| Total extracted particles (no.)              | 4,958,973                         |
| Final particles (no.)                        | 275,460                           |
| Symmetry imposed                             | C8                                |
| Map sharpening B-factor (Å <sup>2</sup> )    | N/A                               |
| Resolution (FSC)                             |                                   |
| Masked (0.143/0.5)                           | 3.1                               |
| Unmasked (0.143/0.5)                         | 4.3                               |
| <b>Model composition</b>                     |                                   |
| Number of chains                             | 8                                 |
| Atoms                                        | 36,976 (hydrogens: 0)             |
| Residues                                     | 4720                              |
| Water                                        | 0                                 |
| Ligands                                      | 0                                 |
| <b>Model validation</b>                      |                                   |
| Bonds (RMSD)                                 |                                   |
| Length (Å) (> 4σ)                            | 0.006 (0)                         |
| Angles (°) (> 4σ)                            | 0.646 (0)                         |
| MolProbity score                             | 1.88                              |
| Clash-score                                  | 8.80                              |
| Ramachandran plot (%)                        |                                   |
| Outliers                                     | 0                                 |
| Allowed                                      | 6.14                              |
| Favored                                      | 93.86                             |
| Rotamer outliers (%)                         | 0                                 |
| Cβ≤ outliers (%)                             | 0                                 |
| Peptide plane (%)                            |                                   |
| Cis proline/general                          | 0.0/0.0                           |
| Twisted proline/general                      | 0.0/0.0                           |
| CaBLAM outliers (%)                          | 1.59                              |
| ADP B-factor (min/max/mean; Å <sup>2</sup> ) | 35.02/143.92/76.97                |
| Occupancy = 1 (%)                            | 100                               |
| Map to model FSC (0.143/0.5, Å)              | 1.9/3.1                           |
| Map correlation coefficient                  | 0.75                              |

The statistics were calculated using CryoSPARC (Punjani et al., 2017) and the phenix.validation\_cryoem tool (Williams et al., 2018).
